# Supplementary material
Source: publisher site journal article supplement (https://www.dovepress.com/article/211072)
Supplement: Supplementary file 1 [file get_supplementary_file.php]

**Supplementary Table 1** List of Institutional Review Boards

| **Institutional Review Boards** |
| --- |
| Ethics Committee on Clinical Trial of Shionogi |
| Aino Clinic Institutional Review Board |
| Tokyo Midtown Clinic Institutional Review Board |
| Medical Corporation EIYUKAI YASUDA Hospital Institutional Review Board |
| Sakayori Clinic Institutional Review Board |
| Sugiura Clinic Institutional Review Board |
| Onishi Medical Clinic Institutional Review Board |
| Maebashi Hirosegawa Clinic Institutional Review Board |
| Clinical Research Hospital Tokyo Institutional Review Board |
| Oita Central Institutional Review Board |
| Nakatani Hospital Institutional Review Board |
| Review Board of Human Rights and Ethics for Clinical Study Institutional Review Board |
| Fukui General Hospital Institutional Review Board |
